1 **TITLE**

2 Molecular principles of Piezo1 activation by increased membrane tension.

3

4 **AUTHOR NAME AND AFFILIATIONS**

5 Dario De Vecchis<sup>1</sup>, David J Beech<sup>1</sup> and Antreas C Kalli<sup>1,2\*</sup>

6

7 <sup>1</sup>School of Medicine and <sup>2</sup>Astbury Centre for Structural Molecular Biology, University of Leeds,  
8 Leeds LS2 9JT, United Kingdom.

9

10 \*Corresponding author

11

12 **SUMMARY PARAGRAPH**

13

14 **Piezo1 is a mechanosensitive channel involved in many cellular functions and responsible for**  
15 **sensing shear-stress and pressure forces in cells**<sup>1–3</sup>. **Piezo1 plays a critical role in the circulatory**  
16 **system and tissue development. Mutations on Piezo1 are linked to human diseases such as**  
17 **lymphedema**<sup>2,4</sup> **or hematological disorders such as hemolytic anaemia**<sup>5</sup> **and resistance to**  
18 **malaria**<sup>6</sup>. **Hypotheses for Piezo1 gating include the “force-from-lipids” principle**<sup>7,8</sup> **that**  
19 **suggests that Piezo1 senses mechanical forces through the bilayer**<sup>1,9</sup> **and a direct involvement**  
20 **of the cytoskeleton as well as the extracellular matrix in Piezo1 activation**<sup>10,11</sup>. **However, the**  
21 **molecular and structural changes underpinning the Piezo1 gating mechanism and how the**  
22 **channel senses forces in the membrane remain unknown. Here we reveal the activation**  
23 **mechanism of Piezo1 and the structural rearrangements that occur when Piezo1 moves from a**  
24 **closed to an open state when mechanical tension is applied to the cell membrane. Our results**  
25 **show that Piezo1’s curved shape is stable in a native-like model membrane without tension**  
26 **creating a membrane indentation with a trilobed topology. Upon stretching Piezo1 adapts to**  
27 **the stretched bilayer by flattening and expansion of its blade region. In our simulations Piezo1**  
28 **expands up to a planar circular area of ~680 nm<sup>2</sup> comparable with previous structural data and**  
29 **hypotheses**<sup>12–14</sup>. **Piezo1 flattening and expansion results in changes in the beam helix tilt angle.**  
30 **These movements result in the tilting and lateral movement of the pore lining TM37 and TM38**  
31 **helices. This leads to the opening of the channel and to the movement of lipids that occupy**  
32 **Piezo1 pore region outside of this region, revealing for the first time the structural changes that**  
33 **happen during Piezo1 mechanical activation. The changes in the blade region are transmitted**  
34 **to helices TM37 and 38 via hydrophobic interactions and by interactions of neighbouring**

35 subunits via the elbow region. The flat structure of Piezo1 identified in this study exposes the  
 36 C-terminal extracellular domain (CED) that in the closed state is hidden in the membrane and  
 37 presumably from shear stress. Our results provide new structural data for different states of  
 38 Piezo1 and suggest the molecular principles by which mechanical force opens the Piezo1  
 39 channel, thus coupling force to physiological effect via ion permeation.

40

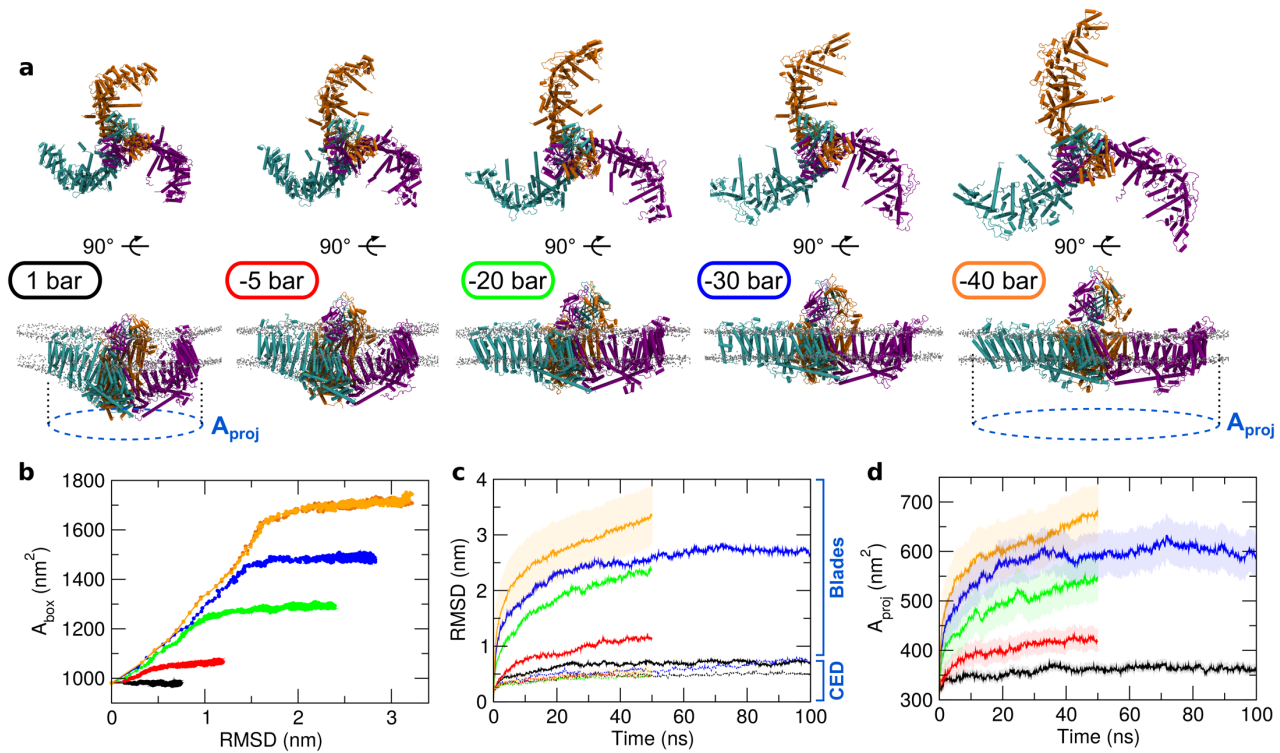

41

42 **Figure 1. Piezo1 channel flattens and its CED becomes exposed in response to increased**  
 43 **membrane tension.** For each system, the applied negative pressure in each simulation is indicated  
 44 with different colours: black, 1 bar; red, -5 bar; green, -20 bar; blue, -30 bar; orange, -40 bar. (a)  
 45 Snapshots of the last frame from simulations of Piezo1 embedded in a model membrane bilayer. (b)  
 46 Correlation between the area, i.e. x-side  $\times$  y-side, of the simulated box ( $A_{box}$ ) and the root mean-  
 47 square deviation (RMSD) calculated using the protein C $\alpha$  of the Piezo1 blades. (c) RMSD calculated  
 48 using the protein C $\alpha$  of the C-terminal extracellular domain (CED), dashed lines (lower values), and  
 49 of the rest of the protein (i.e. the Piezo1 blades), straight lines (higher values). (d) Projected area of  
 50 the Piezo1 membrane indentation on the membrane plane ( $A_{proj}$ , indicated by a dashed blue circle in  
 51 a) as a function of time. For the -40 system the timeline is the average between the two repeats. The  
 52 standard deviation is indicated.

53

54 To investigate how mechanical forces act on the Piezo1 channel, we simulated the recent Piezo1  
55 structure solved by cryo-electron microscopy (cryo-EM) in a model membrane using a serial multi-  
56 scale molecular dynamics (MD) simulation approach. Missing residues were added to the structure  
57 prior to the simulations (see Methods). An initial coarse-grained (CG) simulation of 500 ns was  
58 carried out to equilibrate the bilayer around Piezo1 and create the unique Piezo1 footprint suggested  
59 previously<sup>12–14</sup>. Although the CG approach was critical for creating the Piezo1/membrane system,  
60 it does not allow us to study the Piezo1 dynamics. For this reason, the system was backmapped to an  
61 atomistic resolution and further simulated in independent repeat simulations applying pressure to the  
62 bilayer (i.e. along x and y axes) ranging from the native-like pressure of +1 bar to -40 bar as described  
63 in Methods. Under these conditions, we were able to calculate the lateral pressure ( $P_L$ ) applied on the  
64 bilayer which is 14.2 mN/m for the -5 bar, 45.8 mN/m for the -20 bar, 59 mN/m for the -30 bar and  
65  $67.8 \pm 0.35$  mN/m for the -40 bar system. The asymmetric bilayer used in our simulations mimics the  
66 native endothelial membrane in which Piezo1 functions<sup>15</sup> (see Methods).

67

### 68 **Tension causes Piezo1 to flatten and expand**

69 The different pressures cause expansion of the simulated box to a different degree with the membrane  
70 in the system adapting to each pressure. This results in an increase of the area per lipid (APL) in both  
71 leaflets for all systems; the APL for the system with the highest tension in the bilayer was  $90.09 \pm$   
72  $0.84 \text{ \AA}^2$  and  $89.46 \pm 0.96 \text{ \AA}^2$  the upper and the lower leaflets, respectively (see Supplemental Table  
73 S1 for all APLs). A similar approach revealed that an increase of the APL resulted in the transition of  
74 the TREK-2 mechanosensitive channel for a down to an up conformation<sup>16</sup>.

75

76 Our analysis above shows that the APL reaches a plateau for both leaflets within the first 10 ns of the  
77 simulation. Therefore, each system was simulated for at least 50 ns to allow sufficient time for Piezo1  
78 to equilibrate in the bilayer. Indeed, our analysis shows that the opening of the channel occurs after  
79 the first 10 ns of simulation in conjunction with the increase of the APL (Fig. 4a, b and Supplemental  
80 Table S1). However, to further understand if more extended simulation time alters the APL, two of  
81 our systems the -30 bar and the +1 bar systems were extended to 100 ns. In both cases the analysis  
82 confirms that no change in the APL is observed in the longer simulations (Supplemental Table S1).  
83 Moreover, a further repeat simulation at -40 bar was carried out obtaining a comparable result, thus  
84 indicating that the systems are equilibrated, and the simulated time is sufficient to study the Piezo1  
85 structural transitions under tension. The Piezo1 structure shows a remarkable adaptation to a stretched  
86 bilayer with its N-terminal blades, which remain embedded within the bilayer during all simulations,  
87 to extend towards more flattened conformations (Fig. 1a). The degree of flattening was different for the

88 different tensions with the system with the highest tension resulting in an almost flat Piezo1 structure  
89 (Fig. 1a). Fig. 1b shows the correlation between the area of the simulated box and the root mean-  
90 square deviation (RMSD) calculated using the C $\alpha$  atoms of the blades, demonstrating that they both  
91 increase until the bilayer stops expanding. Note that in the bilayer without tension (+1 bar) Piezo1  
92 maintains its curved shape even though this simulation is twice as long (i.e. 100 ns) as some of the  
93 simulations with a tension applied to the bilayer. This shows that the curved shape of Piezo1 blades  
94 forces the bilayer to adopt a curved trilobed shape. Interestingly, whilst Piezo1 reaches a flat  
95 conformation in both the -30 bar and -40 bar systems, larger conformational changes with more  
96 opening of the pore are observed in the -40 bar simulations. Even when the -30 bar systems were  
97 extended up to 100 ns (compared to 50 ns of the -40), the structural changes in this system were  
98 smaller (Fig. 1a, b), suggesting that there is a cross-talk between Piezo1 and bilayer with Piezo1  
99 sensing forces from the bilayer after it reaches the flat conformation. Our RMSD analysis shows the  
100 Piezo1 blades as the major contributors to the RMSD drift, whereas the CED mostly retained its initial  
101 conformation with comparable values between the systems (Fig. 1c).  
102

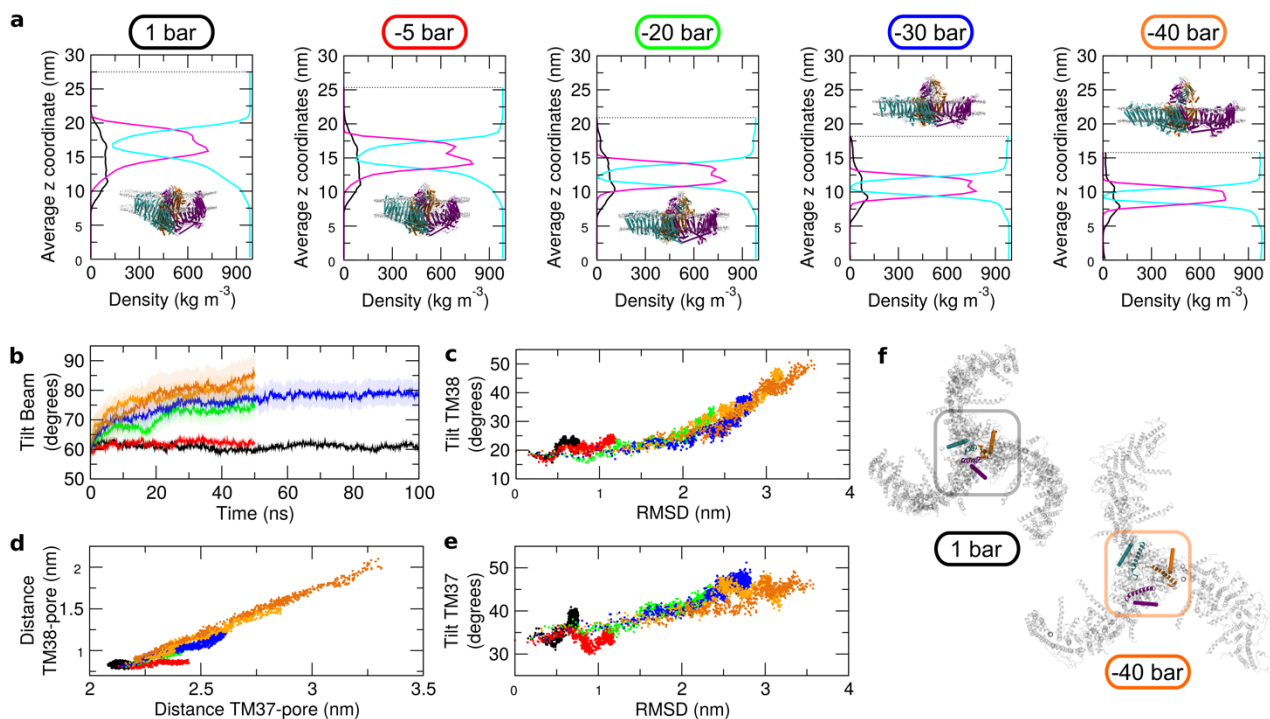

103

104 **Figure 2. Coordinated tilting of Piezo1 channel beams and ion pore helices in response to**  
105 **increased membrane tension.**(a) Partial density profile along the z direction (that is perpendicular  
106 to the bilayer x,y plane) for the protein (black line), the membrane (magenta line) and the solvent (i.e.  
107 water and ions, cyan line). Values from the first repeat at -40 bar are shown here. Insets are the last  
108 frames from simulations as shown in Fig. 1a. (b) Tilt angle relative to the bilayer normal for the beam

109 helix. (c) Correlation between the RMSD of the Piezo1 blades and the tilt angle relative to the bilayer  
110 normal of the TM38 helix. (d) Correlation between the distances from the centre of mass of the TM38  
111 or TM37 helices and the Piezo1 pore (e) Correlation between the RMSD of the Piezo1 blades and the  
112 tilt angle relative to the bilayer normal of the TM37 helix (f) Snapshots of the last frame from the +1  
113 bar and -40 bar systems with the Piezo1 triskelion shown from the extracellular side. The centre of  
114 the triskelion is highlighted. The TM38 (cartoon) and the TM37 (ribbon) from each Piezo1 chain are  
115 also shown. Membrane and solvent are not shown for clarity. The colour code for the applied negative  
116 pressure in each simulation is indicated and is the same as in Fig. 1.

117

118 In addition, our results suggest that upon flattening Piezo1 also expands thus increasing the in-plane  
119 projection of the Piezo1 membrane indentation ( $A_{proj}$ ; Fig 1a). This is in good agreement with recent  
120 studies that also suggested an increase of the  $A_{proj}$  involved in the Piezo1, and recently Piezo2,  
121 activation<sup>12-14</sup>. The  $A_{proj}$  can be approximated by a circle. By approximating the Piezo1 triskelion to  
122 a regular triangle, we calculated the side of this triangle to further determine the circumscribed circle  
123 (i.e. the  $A_{proj}$ ) as described in the Methods. Our approximation is justified by the moderate standard  
124 deviation values of the side of the triskelion (i.e. the side of the triangle) which is  $\pm 0.23$  nm for the  
125 +1 bar,  $\pm 0.53$  nm for the -5 bar,  $\pm 0.95$  nm for the -20 bar,  $\pm 0.88$  nm for the -30 bar and  $\pm 1.07$  nm  
126 and  $\pm 1.23$  nm for the two repeats at -40 bar. This result is also indicative of a concurrent movement  
127 of the Piezo1 blades that flatten at the same time. Fig. 1d shows how the increase of applied  
128 mechanical force during simulations (e.g. more tension), causes an increase of the  $A_{proj}$  values which  
129 reach  $\sim 680$  nm<sup>2</sup> at -40 bar (Fig. 1d, orange line). Recent cryo-EM structural data of the full-length  
130 Piezo2, estimated a  $A_{proj}$  of the dome to 700 nm<sup>2</sup> 14. Although the current value for the full-length  
131 Piezo1 is still unknown, this agreement shows that upon flattening Piezo1 covers the area that is  
132 within the dome in the closed state<sup>14</sup>. This is in good agreement with the suggestion that the dome  
133 provides an energy store for Piezo1 activation<sup>12</sup>. We also note that in our atomistic simulations, even  
134 the +1 bar system shows a mild increase of the  $A_{proj}$  with respect to the initial coordinates from the  
135 cryo-EM (Fig. 1d, black line). Overall, our approach provides novel molecular insights into the  
136 activation and dynamics of Piezo1 in a native-like lipid environment in which this channel functions.  
137 Moreover, we dynamically quantify the different  $A_{proj}$  expansions under different mechanical stress  
138 and the area covered by a flat activated Piezo1 channel. Finally, the extended structure obtained at -  
139 40 bar is corroborated by recent structural data which positively correlate the size of the vesicle with  
140 a flattened Piezo1 structure<sup>13</sup>. Flattening of Piezo1 may also be needed for Yoda1 binding<sup>17</sup>.

141

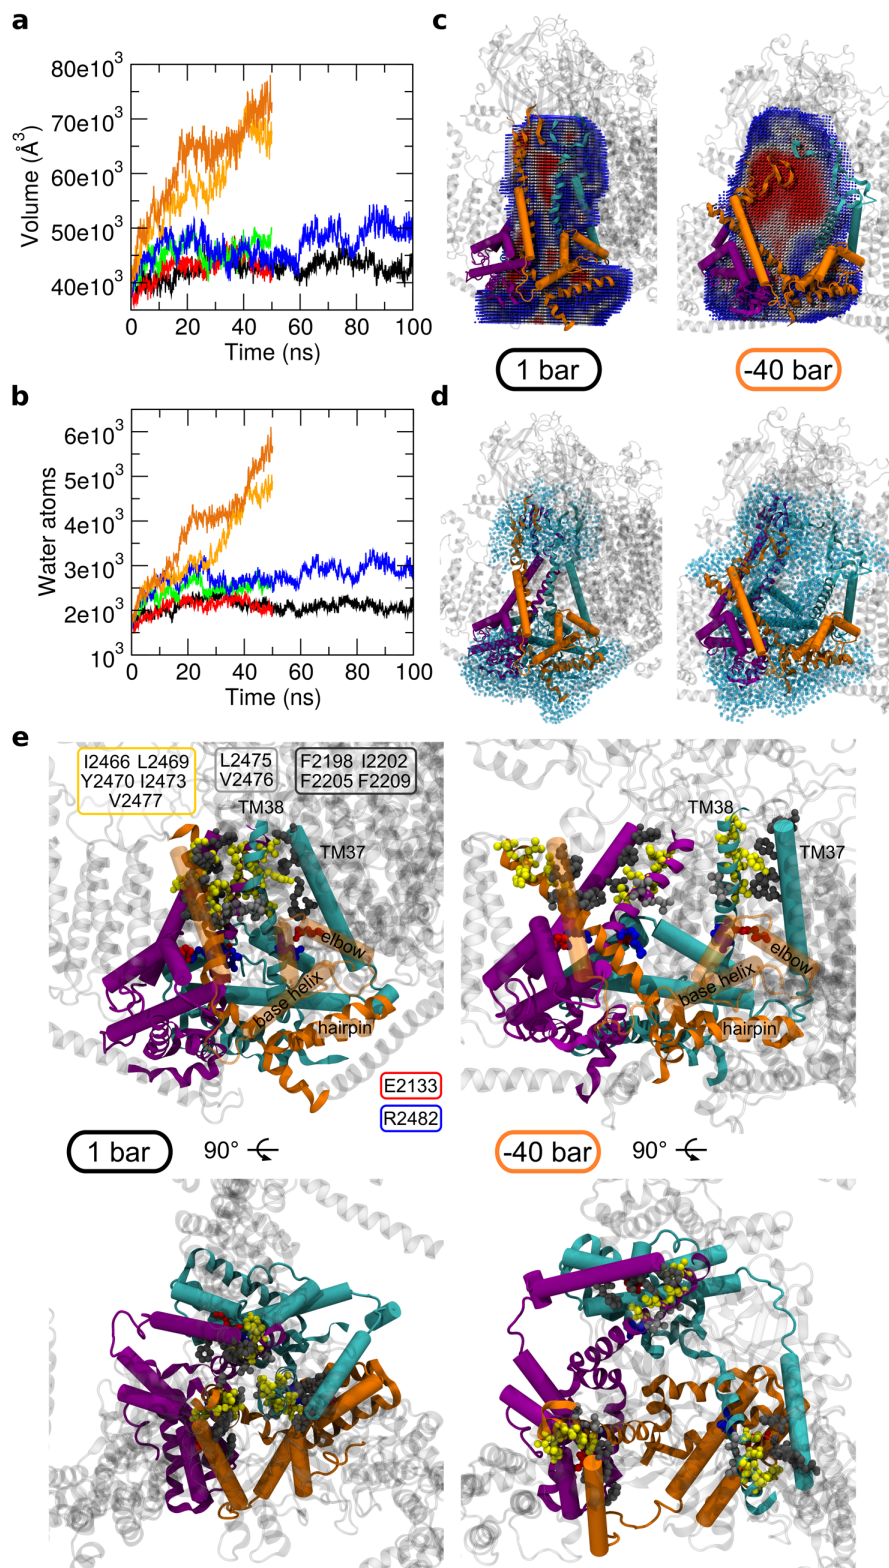

142

143 **Figure 3. Expansion of the Piezo1 channel pore in response to increased membrane tension.** (a)  
144 Volume of the cavity of the Piezo1 pore region as a function of time for each simulated system. The  
145 applied negative pressure in each simulation is indicated with different colours: black, 1 bar; red, -5  
146 bar; green, -20 bar; blue, -30 bar; orange, -40 bar. (b) Number of water molecules overlapping with

147 the calculated cavity in **a** as a function of time for each simulated system. **(c)** Volume of the cavity  
148 within the core of the Piezo1 structure, for the 1 bar and the -40 bar systems. The structures are the  
149 last frames from each simulation and show the Piezo1 pore region. For the -40 bar system the second  
150 repeat simulation is shown. The cavity (sliced) is shown as spheres and coloured according to the  
151 occupancy during the trajectory, from less populated (blue) to more populated (red). Residues  
152 selected for the calculation of the cavity are shown in ribbon (including the TM38 helix, see Methods).  
153 TM37, elbow and base helix are represented as cartoon cylinders. The Piezo1 chains are shown in the  
154 same colours as in Fig. 1a. **(d)** Water molecules within 8 Å from the residues selected for the  
155 calculation of the cavity for the 1 bar and the -40 bar systems. Water molecules are depicted in light  
156 cyan transparent spheres. The structures are the last frames from simulations and show the Piezo1  
157 pore region. For the -40 bar system the second repeat is shown. The protein orientation and colour  
158 code are the same as in **c**. **(e)** Detail of the Piezo1 channel mouth for the 1 bar and the -40 systems  
159 shown from a side (above) and a extracellular (below) view. The structures are the same shown in **c**  
160 and **d** and show the hydrophobic interactions between the pore-lining helices TM38 (yellow residues)  
161 and the TM37 (dark grey residues). The salt bridge between the elbow and the TM38 from a  
162 neighbouring subunit is also shown (red and blue residues). Residues from the Piezo1 hydrophobic  
163 gate (residues L2475, V2476) are in light grey.

164  
165

### 166 **Structural rearrangements in Piezo1 pore**

167 Piezo1 flattening caused by membrane tension results in the displacement of the CED relative to the  
168 membrane plane (Fig 2a). Although our simulations did not show any changes in the position of the  
169 CED domain relative to the transmembrane (TM) domain, CED is hidden within the dome at the  
170 beginning of the simulations or in the system without tension applied in the bilayer. Flattening of  
171 Piezo1 and of the bilayer results in the exposure of CED as it emerges outside the dome. The degree  
172 of CED exposure above the dome increases as the tension in the bilayer increases; in the -30 bar and  
173 -40 bar systems in which a flat Piezo1 was reached CED is fully exposed. The density analysis also  
174 revealed that a considerable portion of the Piezo1 structure remained consistently exposed to the  
175 cytoplasm even after the expansion (Fig 2a). It is possible that these cytoplasmic regions remain  
176 exposed during activation providing a platform for Piezo1 interactions with the cytoskeleton, which  
177 is in agreement with its mechanoprotective role in Piezo1 function<sup>9</sup>.

178

179 Another Piezo1 component which undergoes noticeable structural rearrangement is the beam helix  
180 (residues 1300-1365; Fig. 2b). Our data reveal that during the simulations with tension in the bilayer  
181 there is a change in the tilting angle of each Piezo1 beam (going from ~65° to ~85°), until reaching a

182 position that is almost parallel to the bilayer surface when Piezo1 is in a flat conformation.  
183 Interestingly, the beam tilt movement is correlated with the change in the RMSD (Supplemental Fig.  
184 S1a) suggesting that this movement contributes to Piezo1 flattening. The beam is a long  $\alpha$ -helix  
185 exposed to the cytoplasm which underpasses a great portion of each blade, precisely the three C-  
186 terminal proximal bundles. Therefore, our data suggest that each Piezo1 beam may act as a set of long  
187 levers and their concerted movement during mechanical sensing may possibly contribute to gating.

188

189 The precise molecular details of Piezo1 gating are still largely unknown. The protein is also  
190 characterised by a fast inactivation phase after gating<sup>18,19</sup>. Recent observations proposed a functional  
191 gate possibly regulating Piezo1 inactivation<sup>20</sup>. This gate is composed by the two conserved  
192 hydrophobic residues Leu2475 and Val2476 in the pore-lining TM helix 38<sup>20</sup>. Calculation of the tilt  
193 angle of the TM38 relative to the bilayer normal shows that higher negative pressure, and thus larger  
194 tension, corresponds to a higher tilting of the pore-lining TM38 (Supplemental Fig. S1b). The highest  
195 tilt angle is observed in the -40 bar system (Fig. 2c). Calculation of the distance of TM38 relative to  
196 the pore centre of mass also shows that larger tension, corresponds to a larger displacement  
197 (Supplemental Fig. S1c). Therefore, during flattening and expansion TM38 both increases its tilt  
198 angle and its distance from the pore centre of mass. The change in the TM38 tilting and distance from  
199 the channel pore is correlated with the changes in the RMSD calculated for the Piezo1 blades (Fig.  
200 2c and Supplemental Fig. S1c). This shows that TM38 displacement/tilting occurs whilst Piezo1  
201 flattens and expands (Fig. 2f). Interestingly, we found that the distance from the pore and tilting of  
202 the TM38 also correlates with the distance from the pore and tilting of the TM37 (Fig. 2d, e and  
203 Supplemental Fig. S1d, e), which is located anti-parallel (Fig. 2f). In conclusion, our simulations  
204 suggest a simultaneous lateral movement and tilting of the TM38 and TM37 that results in the opening  
205 of the pore.

206

### 207 **Tension leads to Piezo1 channel opening**

208 Calculation of the water-filled cavity in Piezo1 pore region shows that the volume of this cavity  
209 increases with the applied negative pressures in our simulations until it reaches  $\sim 75000 \text{ \AA}^3$  in the -40  
210 bar (Fig. 3a). In our calculation the cavity is defined by the three TM38 (one from each subunit) and  
211 also some regions of the CED (see Methods), because the loops that connect this domain with the  
212 TM37/38 form a structure similar to a “cage” just above the channel mouth which is characterised by  
213 a funnel-shape (Fig. 3c). Fig. 3a also shows that tension of -30 bar on the membrane, although it  
214 contributes to flattening of Piezo1 structure and almost maximise the beam orientation, is not sufficient  
215 to open the channel pore and maximise the volume of the cavity; the cavity in the -30 system is not



216 hydrated as much as in the -40 bar (Fig. 3b, d). Note that in the simulations of the system with no  
217 tension to the bilayer (1 bar) the cavity did not increase and the channel was not hydrated. We also  
218 found that lipid and cholesterol molecules initially overlap with this volume and therefore they are  
219 within the Piezo1 pore, but they increasingly leave the cavity as higher tension is applied to the bilayer  
220 (Fig. 4a). Three independent system set-ups followed by three independent CG equilibrations  
221 demonstrate that lipids get within the channel mouth during the equilibration phase. This  
222 demonstrates that there is enough space in the current closed structure of Piezo1 for lipids to occupy  
223 the channel mouth. This may also suggest that the presence of lipids in the pore may be required in  
224 order to maintain the channel mouth closed. Our results show that a higher tension to the membrane  
225 (that increases the APL in the proximity of the channel mouth), results in higher volume in the pore  
226 cavity as it enables lipids and cholesterol that occupy the channel mouth to move outside of it in  
227 addition to a larger movement of the pore lining helices. This hypothesis may explain biochemical  
228 data which suggest a functional role of lipids in Piezo1 regulation<sup>21-23</sup>. Therefore, our simulations  
229 suggest that the tension applied to the bilayer during functional activation, results not only in the  
230 displacement of TM38 and TM37 but also in the movement of lipids outside the Piezo1 pore. These  
231 two events occur simultaneously and may both be required for Piezo1 full opening.

232  
233 An open question is how the mechanical stimuli are transferred from the blades to the channel pore.  
234 Our results suggest that the flattening and expansion of the blades is transmitted to the TM helices 37  
235 and 38 guiding the pore opening. Noticeably, the pore region of the homologous Piezo2, has a  
236 remarkably similar structure<sup>14</sup> which lead us to postulate a similar mechanism. In Piezo1 the pore-  
237 lining TM38, is located parallel, although with an opposite orientation, to the TM37. TM37 together  
238 with the elbow region (residues 2116-2142), a base helix (residues 2149 to 2175) and hairpin helices  
239 (residues 2501 to 2534) from all three subunits, create a cuff that encloses the pore-lining TM38<sup>12,13</sup>  
240 (Fig. 3e). Noticeably, in all our simulations we noticed two main pivotal interactions: the first is the  
241 interaction between the TM37 and TM38 via the hydrophobic residues Ile2466, Leu2469, Tyr2470,  
242 Ile2473 and Val2477, that are adjacent to the aforementioned hydrophobic functional gate in TM38  
243 (residues Leu2475 and Val2476<sup>20</sup>) and the residue Phe2198, Ile2202, Phe2205 and Phe2209 from the  
244 TM37 (Fig. 3e). Therefore, extension and expansion of the blades cause the displacement of TM37  
245 that in turn “pulls” the pore-lining helix TM38 due their hydrophobic interactions. This results in the  
246 opening of the channel and might explain why in the -40 bar simulation, in which more expansion  
247 was observed, the pore was more open (Fig. 3e).

248

249 The second pivotal interactions occur in a region towards the C-terminal end of TM37 and TM38.  
250 Previous work suggested the importance of the negative charge at position Glu2133 (Glu2416 in  
251 Piezo2) for conductance and ion selectivity<sup>24</sup>. In particular, the single mutant E2133A showed half  
252 the unitary conductance with respect to the wildtype phenotype and the negative charge from the  
253 glutamate has been suggested to allosterically modulate the selectivity of the Piezo1 filter<sup>24</sup>. The  
254 Piezo1 cryo-EM structure allowed to precisely map the position of the Glu2133, which is located in  
255 a helix named elbow. Interestingly, the tip of each elbow points towards the TM38 of another Piezo1  
256 subunit and in our model we found that Glu2133 on the elbows forms a salt bridge with the Arg2482  
257 in a neighbouring subunit in agreement with previous suggestions<sup>25</sup> (Fig. 3e). This salt bridge is  
258 retained in all our simulations between at least two Piezo1 chains with above 70% of occurrence,  
259 even after Piezo1 conformational rearrangement due to the applied negative pressure (Supplemental  
260 Table S2). This indicates that this interface is possibly maintained during the conformational  
261 transition we observed.

262

263 In agreement with this hypothesis, functional data<sup>24</sup> demonstrated that the mutant G2133D increases  
264 the conductance with respect to the wildtype, which is probably due to the short chain of the aspartate  
265 that would pull backward (i.e towards the elbow) the TM38, thus reducing the pore constriction.  
266 Furthermore, this hypothesis rationalises the effect of the less efficient mutant E2133K that was  
267 shown to decrease Piezo1 conductance<sup>24</sup>. That is, the mutation to lysine opposite to the Arg2482  
268 would push forward the TM38 due to repulsion, contributing in the increase of the channel  
269 constriction. In the E2133K mutant, the salt bridge is broken and so is the connection between the  
270 elbow and the TM38 which results in an impairment of the functional displacement connected to the  
271 blade expansion. In this condition, although less conducting, the channel is still functional<sup>24</sup>, which  
272 may be due to the aforementioned hydrophobic interactions between TM37 and TM38 in synergy  
273 with the proposed of lipid displacement which may act in concert. In conclusion, the predicted salt  
274 bridge between Glu2133 with Arg2482 in a neighbouring subunit would provide an interaction  
275 interface between the Piezo1 chains so that each blade extension would control the gating of a nearby  
276 Piezo1 chain (Fig. 4b). This may also provide a mechanism that ensures a prompt and mutual  
277 propagation of sensing between Piezo1 subunits.

278

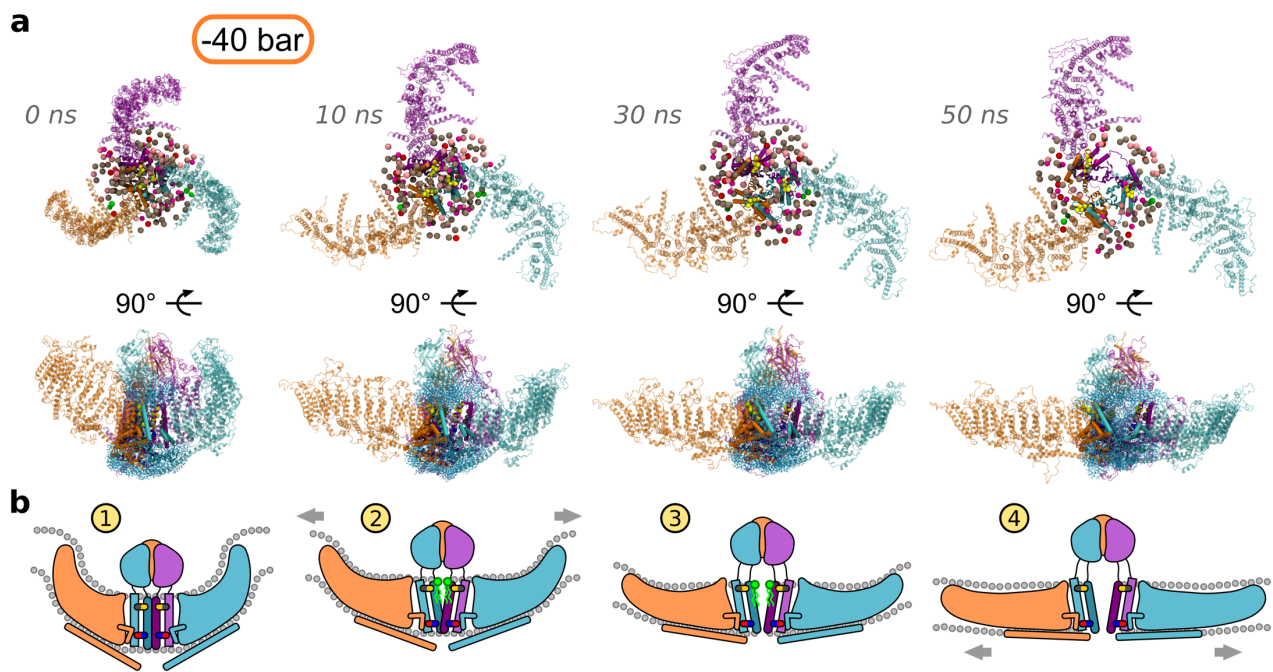

279

280 **Figure 4. Proposed mechanism for the Piezo1 channel opening in response to membrane**  
 281 **tension.** (a) Snapshots from the second repeat simulation at -40 bar with the associated simulation  
 282 time are shown. Membrane bilayer and solvent (i.e. water and ions) are not shown for clarity. The  
 283 three Piezo1 subunits are indicated with different colours as in Fig. 1a. In the extracellular view at  
 284 the top, the CED domain has been removed for clarity. Phosphorous and oxygen atoms from lipid  
 285 headgroups and cholesterol respectively are shown (only lipids that are within 20 Å from the residues  
 286 selected for the calculation of the Piezo1 pore region cavity; see Methods). The colour code is: POPC,  
 287 tan; POPE, pink; POPS, red; PIP<sub>2</sub>, green; cholesterol, magenta. The Cα atoms from interacting  
 288 residues between the helices TM37, TM38 and the elbow are indicated as spheres as in Fig. 3e. In the  
 289 Piezo1 structures in the middle panel, water molecules within 8 Å from the residues selected for the  
 290 calculation of the cavity (see Methods) are shown as light cyan transparent spheres. (b) Cartoon  
 291 representation explaining the Piezo1 activation mechanism coupled to membrane tension. The colour  
 292 code is the same as in a. The hydrophobic interactions between the TM37 and TM38 and the salt  
 293 bridge between TM38 and the elbow from a neighbouring subunit, are indicated in yellow/grey and  
 294 in blue/red, respectively. Lipids that initially occupy the Piezo1 channel mouth and progressively  
 295 move away from it with the increase tension, are schematically depicted in green. Membrane tension  
 296 and Piezo1 blade expansion are indicated by grey arrows.

297

298 In conclusion, this study reveals the molecular principles by which Piezo1 channel opens in response  
 299 to increase membrane tension. The steps during Piezo1 opening are shown in Fig. 4b and are: 1) In a

300 membrane without tension, Piezo1's curved shape forces the bilayer to curve creating a characteristic  
301 indentation with a trilobed topology. This indentation is stable in native condition and the CED is  
302 hidden within it. In this inactive resting conformation, Piezo1 channel mouth is occupied by lipids.  
303 2) Membrane tension on the bilayer results in the flattening and extension of its blades and tilting of  
304 its beams helices. 3) Piezo1 expansion and flattening allows the blades to "pull" helices 37 and 38,  
305 via hydrophobic interactions, to tilt and progressively move away from the channel pore opening  
306 Piezo1. 4) In the open conformation Piezo1 blades are fully extended and flat, CED is exposed, beam  
307 helices are almost parallel to the lipid bilayer. The elbow regions from neighbouring subunits, also  
308 pull the pore-lining helices 38. At the same time the increase in the area per lipid due to tension allows  
309 displacement of the lipids that occupy the channel mouth resulting in an open. Therefore, both  
310 conformational changes and the increase in the APL that allows movement of lipids outside the  
311 channel pore region are required for Piezo1 opening.

312

313 This work provides molecular understanding of the structural rearrangements within Piezo1 that lead  
314 to gating and highlight the critical role of membrane lipids in Piezo1 opening. Our study demonstrates  
315 how the fascinating fold and shape of Piezo channels allow this protein to sense mechanical force  
316 thus playing a central role in transduction of mechanical signals throughout the membrane. Our  
317 findings have important implications for understanding mechanosensing in general, which is critical  
318 in stem cell niche commitment, vascular biology and development and are instrumental for  
319 understanding Piezo1 channel-related disease such as lymphoedema, anaemia and malaria.

320

## 321 **METHODS**

322 **Modeling the Piezo1 trimer.** Structural data were obtained from the cryo-EM structure PDB:  
323 6B3R12. Missing residues were added with MODELLER (v 9.19)<sup>26</sup> and the loop refinement tool<sup>27</sup>  
324 was used to remove a knot in one chain between residues 1490-1498. The best loop was selected out  
325 of 10 candidates according to the discrete optimized protein energy method<sup>28</sup>. The final Piezo1 model  
326 does not comprises the first 576 residues because they are not present in the template and residues  
327 718-781, 1366-1492, 1579-1654, 1808-1951 which are exposed to the cytosol and predicted as  
328 unstructured. Therefore, each chain is composed by five non-overlapping fragments: residues 577-  
329 717, 782-1365, 1493-1578, 1655-1807 and 1952-2547. The Piezo1 model obtained was further  
330 energy minimised in vacuum with GROMACS 2016<sup>29</sup> prior simulations.

331

332 **Coarse-grained simulations.** Prior atomistic simulations the Piezo1 model obtained as described  
333 above was converted to a CG resolution and energy minimised. The coarse-grained molecular  
334 dynamics (CG-MD) simulation was essential to equilibrate the lipid bilayer around the protein and  
335 reconstitute the Piezo1 membrane indentation. The CG-MD simulations were performed using the  
336 Martini 2.2 force field<sup>30</sup> and GROMACS 2016<sup>29</sup>. To model the protein secondary and tertiary  
337 structure an elastic network model with a cut-off distance of 7 Å was used. The elastic network  
338 restricts any major conformational change within the protein during the CG-MD simulations. For the  
339 equilibration simulation Piezo1 model was inserted in a complex asymmetric bilayer using the INSert  
340 membrANE tool<sup>31</sup>. Three independent system assembly steps and CG equilibrations were carried out,  
341 the first from both were used in this study. The composition of the model bilayer is the following:  
342 For the outer leaflet, 1-palmitoyl-2-oleyl-phosphatidylcholine (POPC) 55%, sphingomyelin (SM) 5%,  
343 1-palmitoyl-2-oleyl-phosphatidylethanolamine (POPE) 20% and cholesterol 20%. For the inner  
344 leaflet, POPC 50%, POPE 20%, 1-palmitoyl-2-oleyl-phosphatidylserine (POPS) 5%, cholesterol 20%  
345 and phosphatidylinositol 4,5-bisphosphate (PIP<sub>2</sub>) 5%. The system was neutralised with a 150 mM  
346 concentration of NaCl. The model was further energy minimised and subsequently equilibrated for  
347 500 ns with the protein particles restrained ( $1000 \text{ kJ} \cdot \text{mol}^{-1} \cdot \text{nm}^{-2}$ ) to allow the membrane bilayer to  
348 equilibrate around the model. The equilibration was performed at 323 K, with protein, lipids and  
349 solvent separately coupled to an external bath using the v-rescale thermostat<sup>32</sup> (coupling constant of  
350 1.0). The temperature of 323 K is above the transition temperatures of all lipid species in the systems,  
351 therefore avoiding the lipids to undergo phase transitions to the gel phase. Pressure was maintained  
352 at 1 bar (coupling constant of 1.0) with semi-isotropic conditions and compressibility of  $3 \times 10^{-6}$  using  
353 the Berendsen barostat<sup>33</sup>. Lennard-Jones and Coulombic interactions were shifted to zero between 9  
354 and 12 Å, and between 0 and 12 Å, respectively.

355  
356 **Atomistic simulations.** After the CG-MD equilibration the system was carefully checked. Two  
357 molecules of POPC were removed because the head-group was trapped between Piezo1  
358 transmembrane bundles. Moreover, in order to restore membrane asymmetry, two molecules of PIP<sub>2</sub>  
359 were removed because they flipped to the outer leaflet. The system obtained was minimised and  
360 further converted to atomistic resolution as described in<sup>34</sup>. A concentration of 3.0 mM of Ca<sup>2+</sup> (i.e.  
361 50 ions) was added to the box and neutrality restored with counterions. The obtained system was  
362 energy minimised and subsequently equilibrated in four NPT ensemble runs of 20000 steps each with  
363 an increasing time-step from 0.2 fs to 2 fs and the protein particles restrained ( $1000 \text{ kJ} \cdot \text{mol}^{-1} \cdot \text{nm}^{-2}$ ).  
364 A further equilibration step of 5 ns with a time-step of 1 fs and C $\alpha$  atoms restrained ( $1000 \text{ kJ} \cdot \text{mol}^{-1} \cdot \text{nm}^{-2}$ )  
365 was performed in order to relax the Piezo1 model embedded in a highly curved bilayer (i.e.

366 the membrane indentation). Stretch-induced conformational changes in the Piezo1 model were  
367 investigated by NPT ensemble unrestrained simulations of 50 ns were the bilayer plane (xy-plane)  
368 pressure was varied semiisotropically between -40, -30, -20, -5 and +1 bar, whereas the pressure in  
369 bilayer normal (z) direction kept at +1 bar. The +1 bar and the -30 bar systems were further extended  
370 to 100 ns. A similar approach revealed insightful for investigate structural transitions for the TREK-  
371 2 mechanosensitive channel<sup>16</sup>. All the atomistic systems were simulated using GROMACS 2016<sup>29</sup>  
372 with CHARMM36 force field<sup>34</sup> and a 2 fs time step. A Berendsen semi-isotropic pressure coupling<sup>33</sup>  
373 at 1 bar was used during all the equilibration phases. The Parrinello-Rahman barostat<sup>36</sup> was further  
374 used for the stretch-induced simulations. All simulations were performed at 323 K with protein, lipids  
375 and solvent coupled to an external bath using the v-rescale thermostat. Long-range electrostatics were  
376 managed using the particle-mesh Ewald method<sup>37</sup>. The LINCS algorithm was used to constrain bond  
377 lengths<sup>38</sup>.

378

### 379 **Analysis and computer graphics**

380 To calculate the area of the box the tool gm energy from GROMACS 2016<sup>29</sup> was used to extract,  
381 for each frame, the x-side and the y-side of the simulated box. The area was subsequently calculated  
382 by multiplying these values as x-side  $\times$  y-side. The root mean-square deviation was calculated on the  
383 protein C $\alpha$  using the gm rms tool from GROMACS 2016<sup>29</sup>. For each system the initial coordinates  
384 were considered as a reference structure. For the system at -40 bar, the error is the standard deviation.  
385 The  $A_{proj}$  was calculated as follow: The program visual molecular dynamics 1.9.3 (VMD)<sup>39</sup>  
386 (<http://www.ks.uiuc.edu/Research/vmd/>) was used to calculate distances between the residue Ala641,  
387 located within the first bundle embedded in the bilayer, from each Piezo1 chain and for each  
388 trajectory. Values were then averaged by chain with the standard deviation as error. The average  
389 distance calculated was then used to calculate the radius  $r$  of the circumscribed circle using an in-  
390 house script dividing the average distance (i.e. the side of a regular triangle) by square root 3. The  
391 area of the circumference was then calculated as  $\pi \times r^2$ . In every step the standard deviation was  
392 calculated. The average partial density was calculated using the GROMACS 2016<sup>29</sup> tool gm density.  
393 The tilting angle relative to the bilayer normal and distance from the Piezo1 pore of the Piezo1 beams,  
394 pore-lining helices 38 and 37, were calculated using gm bundle and gm distance tools from  
395 GROMACS 2016<sup>29</sup>. For all calculations, the Piezo1 pore region comprised the same residues that  
396 were used for the calculation of the cavity (see below). The tool trj\_cavity<sup>40</sup>  
397 (<https://sourceforge.net/projects/trjcavity/>) was used for the calculation of the volume of the Piezo1  
398 pore cavity as well as for the water molecules that overlap to it. The considered residues were 2450-  
399 2547, 2214-2224 and 2326-2334. The trajectories were fitted on the C $\alpha$  of the considered residues

400 before the calculation and options -dim 4 (i.e. the degree of how buried they were) and -spacing 1.4  
401 (i.e. the size of the grid voxel in Å) were used. Salt bridges were calculated with VMD 1.9.3<sup>39</sup> using  
402 a 6 Å cut-off and, when indicated (see Supplemental Table S2), without considering the first 30 ns of  
403 simulation. For the calculation of the APL the tool GridMAT-MD<sup>41</sup>, version 2.0  
404 (<http://www.bevanlab.biochem.vt.edu/GridMAT-MD/>) was used. The lateral pressure  $P_L$  was  
405 calculated as explained for the TREK-2 mechanosensitive channel<sup>16</sup>. Molecular graphics were done  
406 using VMD 1.9.3<sup>39</sup>. Data were plotted using Grace (<http://plasma-gate.weizmann.ac.il/Grace/>).

407

## 408 REFERENCES

- 409 1. Wu, J., Lewis, A. H. & Grandl, J. Touch, Tension, and Transduction – The Function and  
410 Regulation of Piezo Ion Channels. *Trends Biochem. Sci.* **42**, 57–71 (2017).
- 411 2. Beech, D. J. & Kalli, A. C. Force Sensing by Piezo Channels in Cardiovascular Health and  
412 Disease. *Arterioscler. Thromb. Vasc. Biol.* ATVBAHA119313348 (2019).  
413 doi:10.1161/ATVBAHA.119.313348
- 414 3. Li, J. *et al.* Piezo1 integration of vascular architecture with physiological force. *Nature* **515**,  
415 279–282 (2014).
- 416 4. Fotiou, E. *et al.* Novel mutations in PIEZO1 cause an autosomal recessive generalized  
417 lymphatic dysplasia with non-immune hydrops fetalis. *Nat. Commun.* **6**, 8085 (2015).
- 418 5. Andolfo, I. *et al.* Multiple clinical forms of dehydrated hereditary stomatocytosis arise from  
419 mutations in PIEZO1. *Blood* **121**, 3925–3935 (2013).
- 420 6. Ma, S. *et al.* Common PIEZO1 Allele in African Populations Causes RBC Dehydration and  
421 Attenuates Plasmodium Infection. *Cell* **173**, 443–455.e12 (2018).
- 422 7. Teng, J., Loukin, S., Anishkin, A. & Kung, C. The force-from-lipid (FFL) principle of  
423 mechanosensitivity, at large and in elements. *Pflugers Arch.* **467**, 27–37 (2015).
- 424 8. Martinac, B., Adler, J. & Kung, C. Mechanosensitive ion channels of *E. coli* activated by  
425 amphipaths. *Nature* **348**, 261–3 (1990).
- 426 9. Cox, C. D. *et al.* Removal of the mechanoprotective influence of the cytoskeleton reveals  
427 PIEZO1 is gated by bilayer tension. *Nat. Commun.* **7**, 10366 (2016).
- 428 10. Poole, K., Moroni, M. & Lewin, G. R. Sensory mechanotransduction at membrane-matrix  
429 interfaces. *Pflügers Arch. - Eur. J. Physiol.* **467**, 121–132 (2015).
- 430 11. Prager-Khoutorsky, M., Khoutorsky, A. & Bourque, C. W. Unique Interweaved Microtubule  
431 Scaffold Mediates Osmosensory Transduction via Physical Interaction with TRPV1. *Neuron*  
432 **83**, 866–878 (2014).
- 433 12. Guo, Y. R. & MacKinnon, R. Structure-based membrane dome mechanism for Piezo

- 434 mechanosensitivity. *Elife* **6**, e33660 (2017).
- 435 13. Lin, Y.-C. *et al.* Force-induced conformational changes in PIEZO1. *Nature* 1–5 (2019).
- 436 doi:10.1038/s41586-019-1499-2
- 437 14. Wang, L. *et al.* Structure and mechanogating of the mammalian tactile channel PIEZO2.
- 438 *Nature* 1–5 (2019). doi:10.1038/s41586-019-1505-8
- 439 15. Murphy, E. J., Joseph, L., Stephens, R. & Horrocks, L. A. Phospholipid composition of
- 440 cultured human endothelial cells. *Lipids* **27**, 150–153 (1992).
- 441 16. Aryal, P. *et al.* Bilayer-Mediated Structural Transitions Control Mechanosensitivity of the
- 442 TREK-2 K2P Channel. *Structure* **25**, 708-718.e2 (2017).
- 443 17. Botello-Smith, W. M. *et al.* A mechanism for the activation of the mechanosensitive Piezo1
- 444 channel by the small molecule Yoda1. *Nat. Commun.* **10**, 4503 (2019).
- 445 18. Wu, J. *et al.* Inactivation of Mechanically Activated Piezo1 Ion Channels Is Determined by
- 446 the C-Terminal Extracellular Domain and the Inner Pore Helix. *Cell Rep.* **21**, 2357–2366
- 447 (2017).
- 448 19. Coste, B. *et al.* Piezo1 and Piezo2 are essential components of distinct mechanically
- 449 activated cation channels. *Science* **330**, 55–60 (2010).
- 450 20. Zheng, W., Gracheva, E. O. & Bagriantsev, S. N. A hydrophobic gate in the inner pore helix
- 451 is the major determinant of inactivation in mechanosensitive Piezo channels. *Elife* **8**, e44003
- 452 (2019).
- 453 21. Borbiri, I., Badheka, D. & Rohacs, T. Activation of TRPV1 channels inhibits
- 454 mechanosensitive piezo channel activity by depleting membrane phosphoinositides. *Sci.*
- 455 *Signal.* **8**, ra15 (2015).
- 456 22. Romero, L. O. *et al.* Dietary fatty acids fine-tune Piezo1 mechanical response. *Nat. Commun.*
- 457 **10**, 1200 (2019).
- 458 23. Pliotas, C. & Naismith, J. H. Spectator no more, the role of the membrane in regulating ion
- 459 channel function. *Curr. Opin. Struct. Biol.* **45**, 59–66 (2017).
- 460 24. Coste, B. *et al.* Piezo1 ion channel pore properties are dictated by C-terminal region. *Nat.*
- 461 *Commun.* **6**, 7223 (2015).
- 462 25. Kefauver, J. M. *et al.* Structure of the mechanically activated ion channel Piezo1. *Nature* **554**,
- 463 481–486 (2017).
- 464
- 465 **METHODS ONLY REFERENCES:**
- 466 26. Šali, A. & Blundell, T. L. Comparative protein modelling by satisfaction of spatial restraints.
- 467 *J. Mol. Biol.* **234**, 779–815 (1993).



- 468 27. Fiser, A., Do, R. K. & Sali, A. Modeling of loops in protein structures. *Protein Sci.* **9**, 1753–  
469 73 (2000).
- 470 28. Shen, M.-Y. & Sali, A. Statistical potential for assessment and prediction of protein  
471 structures. *Protein Sci.* **15**, 2507–24 (2006).
- 472 29. Abraham, M. J. *et al.* GROMACS: High performance molecular simulations through multi-  
473 level parallelism from laptops to supercomputers. *SoftwareX* **1–2**, 19–25 (2015).
- 474 30. De Jong, D. H. *et al.* Improved parameters for the martini coarse-grained protein force field.  
475 *J. Chem. Theory Comput.* **9**, 687–697 (2013).
- 476 31. Wassenaar, T. A., Ingólfsson, H. I., Böckmann, R. A., Tieleman, D. P. & Marrink, S. J.  
477 Computational Lipidomics with *insane* : A Versatile Tool for Generating Custom Membranes  
478 for Molecular Simulations. *J. Chem. Theory Comput.* **11**, 2144–2155 (2015).
- 479 32. Bussi, G., Donadio, D. & Parrinello, M. Canonical sampling through velocity rescaling. *J.*  
480 *Chem. Phys.* **126**, 14101 (2007).
- 481 33. Berendsen, H. J. C., Postma, J. P. M., van Gunsteren, W. F., DiNola, A. & Haak, J. R.  
482 Molecular dynamics with coupling to an external bath. *J. Chem. Phys.* **81**, 3684–3690 (1984).
- 483 34. Wassenaar, T. A., Pluhackova, K., Böckmann, R. A., Marrink, S. J. & Tieleman, D. P. Going  
484 backward: A flexible geometric approach to reverse transformation from coarse grained to  
485 atomistic models. *J. Chem. Theory Comput.* **10**, 676–690 (2014).
- 486 35. Lee, S. *et al.* CHARMM36 united atom chain model for lipids and surfactants. *J. Phys.*  
487 *Chem. B* **118**, 547–556 (2014).
- 488 36. Parrinello, M. & Rahman, A. Polymorphic transitions in single crystals: A new molecular  
489 dynamics method. *J. Appl. Phys.* **52**, 7182–7190 (1981).
- 490 37. Darden, T., York, D. & Pedersen, L. Particle mesh Ewald: An  $N \cdot \log(N)$  method for Ewald  
491 sums in large systems. *J. Chem. Phys.* **98**, 10089–10092 (1993).
- 492 38. Hess, B., Bekker, H., Berendsen, H. J. C. & Fraaije, J. G. E. M. LINCS: A linear constraint  
493 solver for molecular simulations. *J. Comput. Chem.* **18**, 1463–1472 (1997).
- 494 39. Humphrey, W., Dalke, A. & Schulten, K. VMD: visual molecular dynamics. *J. Mol. Graph.*  
495 **14**, 33–8, 27–8 (1996).
- 496 40. Paramo, T., East, A., Garzón, D., Ulmschneider, M. B. & Bond, P. J. Efficient  
497 characterization of protein cavities within molecular simulation trajectories: *trj\_cavity*. *J.*  
498 *Chem. Theory Comput.* **10**, 2151–2164 (2014).
- 499 41. Allen, W. J., Lemkul, J. A. & Bevan, D. R. GridMAT-MD: A grid-based membrane analysis  
500 tool for use with molecular dynamics. *J. Comput. Chem.* **30**, 1952–1958 (2009).
- 501

502

503 **ACKNOWLEDGEMENTS**

504 ACK and DDV are funded by an Academy of Medical Sciences and Wellcome Trust Springboard  
505 Award. DJB is funded by a Wellcome Trust Investigator Award.

506

507 **COMPETING INTERESTS**

508 We have no competing interests to report.

509

510 **MATERIAL AND CORRESPONDANCE**

511 Any requests can be sent to Antreas C Kalli.

512

513 **AUTHOR CONTRIBUTION**

514 D.DV. Built the model, performed simulations and analysed the data. The research was  
515 conceptualised by A.C.K. and D.J.B., A.C.K and D.J.B. acquired funding and supervised the project.

516 D.DV. Wrote the first draft. All authors revised the first draft.

517

518 **ADDITIONAL INFORMATION**

519 A supplemental figure (Supplemental Fig. S1) and two tables of additional data (Supplemental Table  
520 S1 and Supplemental Table S2) accompany this paper.

521

522 **DATA AVAILABILITY**

523 Data will be available a doi at the University of Leeds

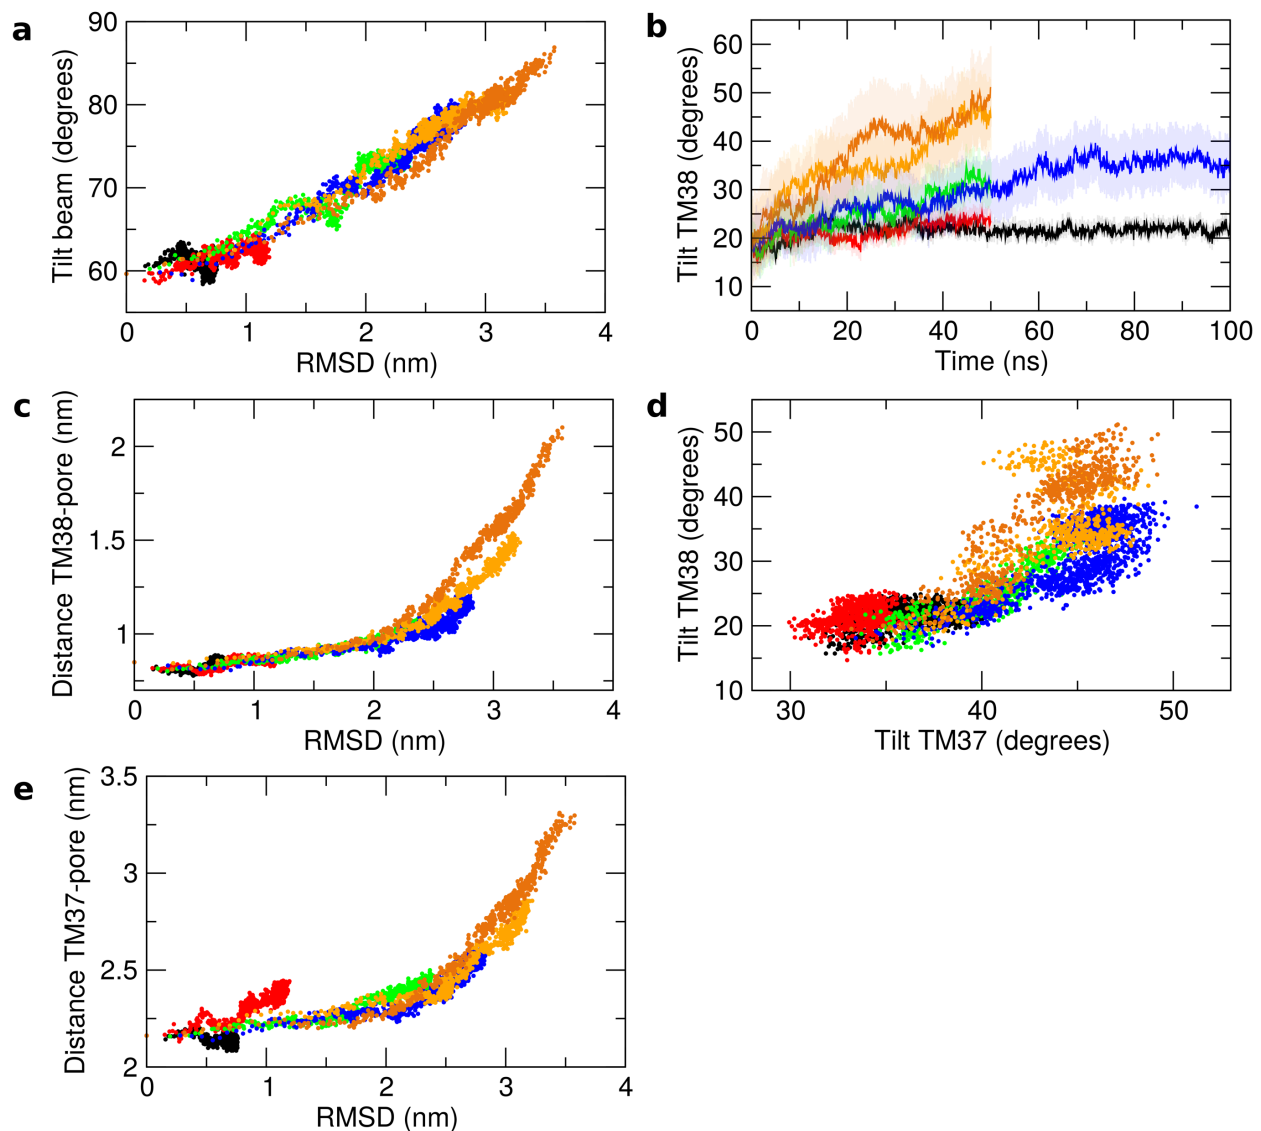

524

525 **Supplemental Figure S1. Correlation of Piezo1 pore-lining helices with changes in Piezo1**  
526 **conformation.** For each system, the applied negative pressure in each simulation is indicated with  
527 different colours: black, 1 bar; red, -5 bar; green, -20 bar; blue, -30 bar; orange, -40 bar. (a)  
528 Correlation between the root mean-square deviation (RMSD) of the Piezo1 blades and the tilt angle  
529 relative to the bilayer normal of the beam helix. (b) Tilt angle relative to the bilayer normal for the  
530 TM38 helix. (c) Correlation between the RMSD of the Piezo1 blades and the distance from the centre  
531 of mass of the TM38 helix and the Piezo1 pore. (d) Correlation between the tilt angle relative to the  
532 bilayer normal of the TM38 and TM37 helices. (e) Correlation between the RMSD of the Piezo1  
533 blades and the distance from the respective centre of mass of the TM37 helix and the Piezo1 pore.  
534

---

**Supplemental Table S1. Area per lipid during simulations.**

---

|               | <i>+1 bar</i> |           | <i>-5 bar</i> |           | <i>-20 bar</i> |           | <i>-30 bar</i> |           | <i>-40 bar</i>        |                       |
|---------------|---------------|-----------|---------------|-----------|----------------|-----------|----------------|-----------|-----------------------|-----------------------|
|               | <i>up</i>     | <i>lw</i> | <i>up</i>     | <i>lw</i> | <i>up</i>      | <i>lw</i> | <i>up</i>      | <i>lw</i> | <i>up</i> ± <i>sd</i> | <i>lw</i> ± <i>sd</i> |
| <i>0 ns</i>   | 40.19         | 64.92     | 40.19         | 64.92     | 40.19          | 64.92     | 40.19          | 64.92     | 40.19 ± 0             | 64.92 ± 0             |
| <i>10 ns</i>  | 40.21         | 63.16     | 43.72         | 68.32     | 63.06          | 68.57     | 77.10          | 78.13     | 86.83 ± 2.58          | 92.8 ± 1.87           |
| <i>20 ns</i>  | 37.21         | 74.51     | 45.26         | 64.95     | 66.61          | 65.83     | 77.66          | 76.03     | 90.09 ± 0.28          | 88.88 ± 0.26          |
| <i>30 ns</i>  | 38.30         | 69.36     | 48.39         | 59.68     | 67.62          | 64.85     | 78.80          | 76.02     | 90.18 ± 0.66          | 89 ± 0.94             |
| <i>40 ns</i>  | 42.52         | 57.29     | 51.91         | 55.94     | 66.60          | 64.88     | 78.30          | 76.19     | 90.19 ± 0.14          | 89.16 ± 0.08          |
| <i>50 ns</i>  | 40.04         | 65.08     | 53.24         | 53.57     | 66.86          | 64.18     | 78.52          | 76.09     | 90.09 ± 0.84          | 89.46 ± 0.96          |
| <i>60 ns</i>  | 40.60         | 63.62     |               |           |                |           | 78.05          | 75.78     |                       |                       |
| <i>70 ns</i>  | 38.29         | 72.12     |               |           |                |           | 77.72          | 75.99     |                       |                       |
| <i>80 ns</i>  | 39.45         | 63.92     |               |           |                |           | 78.30          | 76.39     |                       |                       |
| <i>90 ns</i>  | 41.68         | 61.33     |               |           |                |           | 78.38          | 76.22     |                       |                       |
| <i>100 ns</i> | 40.77         | 62.91     |               |           |                |           | 77.75          | 76.31     |                       |                       |

Values are in Å<sup>2</sup>. *up*, upper leaflet; *lw*, lower leaflet; *sd*, standard deviation.

535

536

**Supplemental Table S2.** Predicted salt bridge between the elbow and the pore-lining helix 38

|                   | <i>+1 bar</i> | <i>-5 bar</i> | <i>-20 bar</i> | <i>-30 bar</i> | <i>-40 bar</i><br>(rep1) | <i>-40 bar</i><br>(rep 2) |
|-------------------|---------------|---------------|----------------|----------------|--------------------------|---------------------------|
| E2133.a - R2482.c | 100           | 100           | 100            | 100            | 100                      | 100                       |
| E2133.a - R2482.b | 98            | 98            | 100            | 96             | 70 (98)                  | 100 (100)                 |
| E2133.b - R2482.c | 100           | 100           | 100            | 7 (62)         | 8 (89)                   | 7 (83)                    |

When occurrence was lower than 70%, numbers between parentheses indicate occurrence within the first 30 ns of simulations.

537

538

539

540

541

542

543

544

545

546
